# Supplementary material for: Salicylic acid in Populus tomentosa is a remote signalling molecule induced by Botryosphaeria dothidea infection
Source: PubMed Central journal article supplement (PMC6145909; doi:10.1038/s41598-018-32204-9), 2018-09-19
Supplement: 41598_2018_32204_MOESM1_ESM.pdf [file 41598_2018_32204_MOESM1_ESM.pdf]

**Salicylic acid in *Populus tomentosa* is a remote signalling molecule induced by  
the *Botryosphaeria dothidea* infection**

Yong-xia Li<sup>1,2</sup>✉, Wei Zhang<sup>1,2</sup>✉, Hui-xia Dong<sup>1,3</sup>, Zhen-yu Liu<sup>2,4</sup>, Jian Ma<sup>1,2</sup>, Xing-yao Zhang<sup>1,2</sup>

<sup>1</sup>Lab. of Forest Pathogen Integrated Biology, Research Institute of Forestry New Technology, Chinese Academy of Forestry, Beijing 100091, China

<sup>2</sup>Co-Innovation Center for Sustainable Forestry in Southern China, Nanjing Forestry University, Nanjing 210037, China

<sup>3</sup>College of Life Science, Henan Normal University, Xinxiang 453007, China

<sup>4</sup>College of Plant Protection, Shandong Agricultural University, Tai'an 271018, China

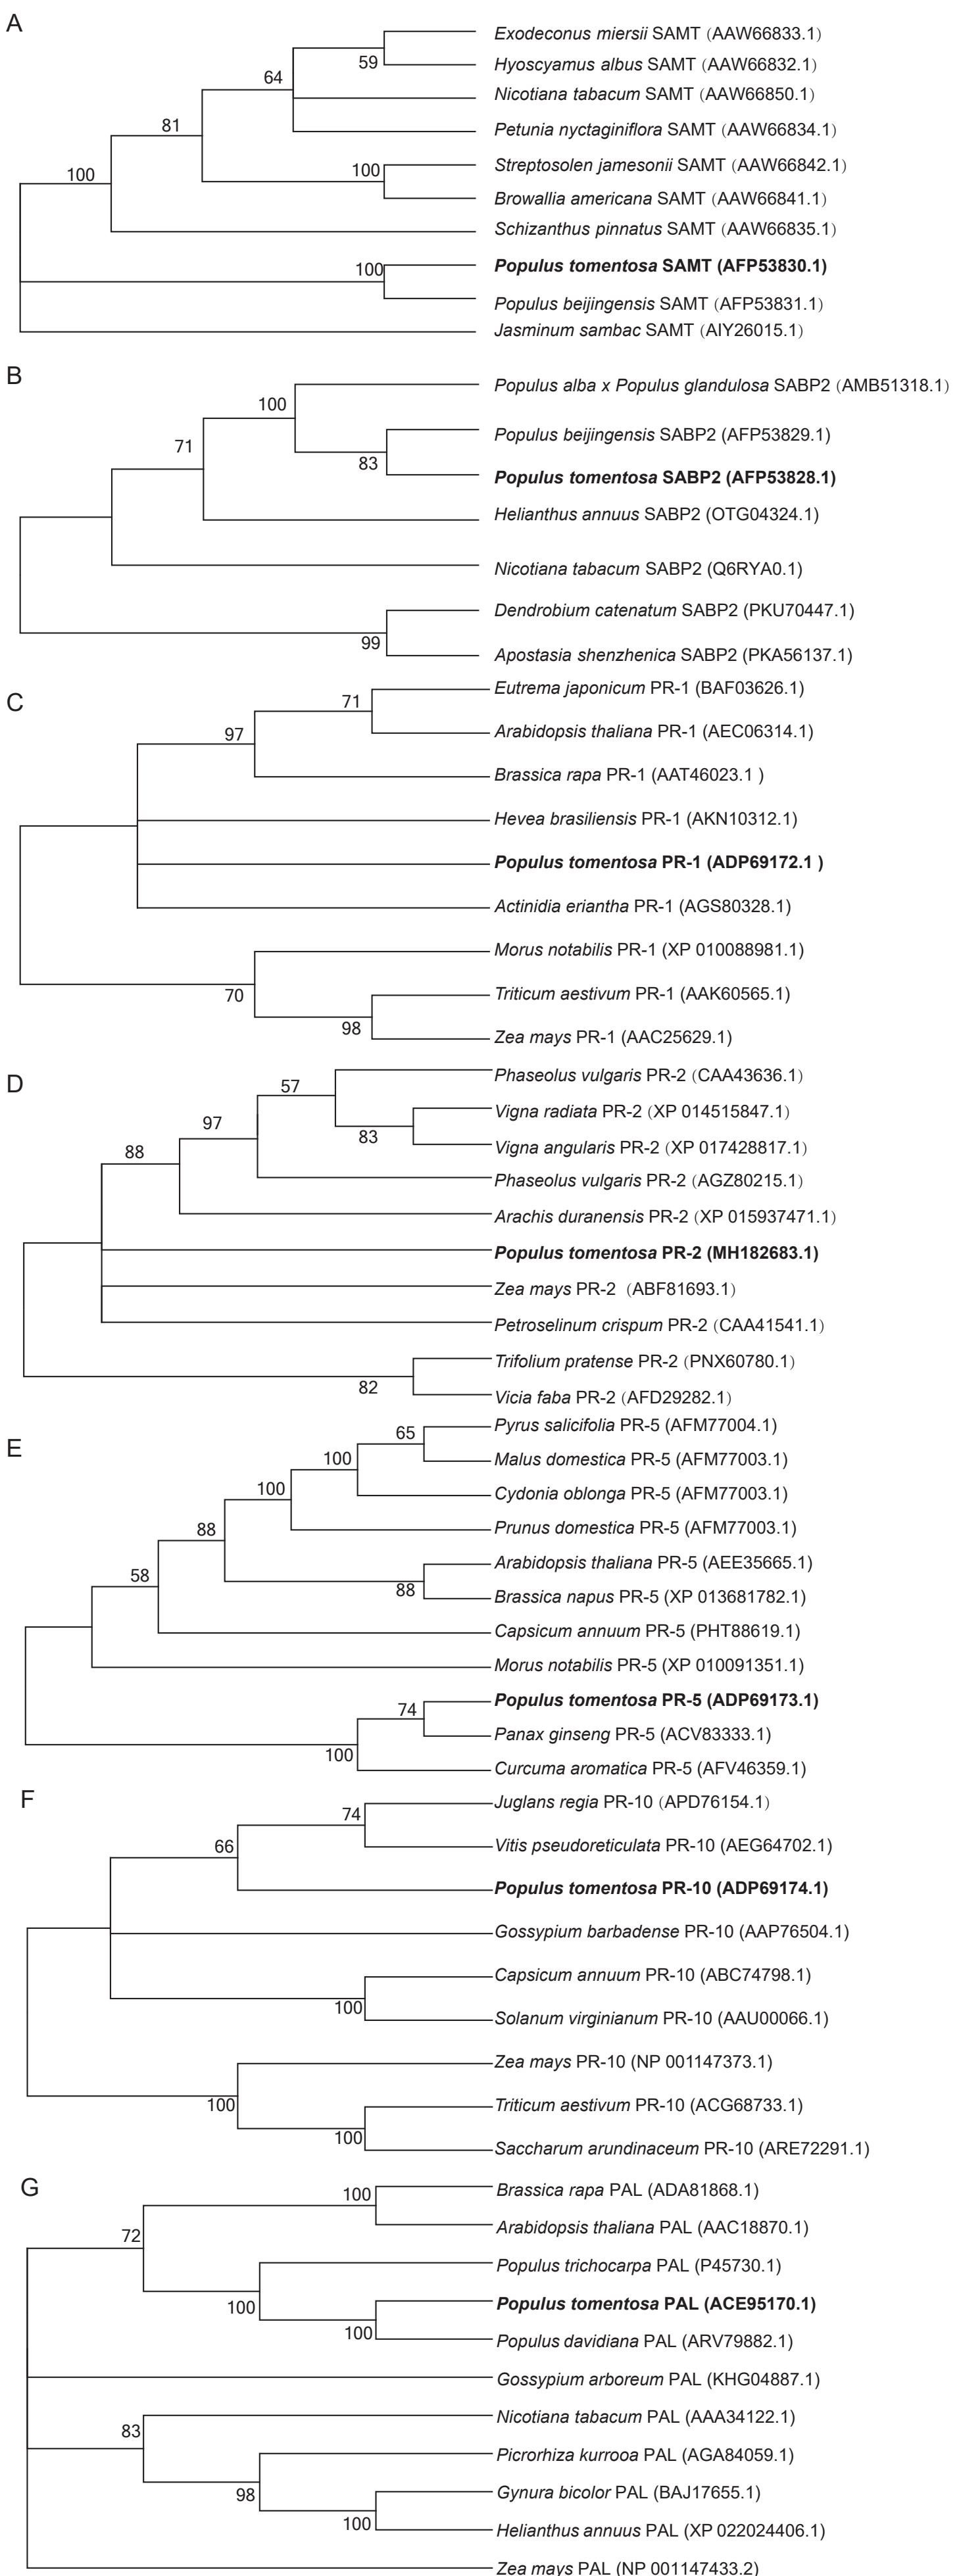

**Fig. S1 Phylogenetic trees of PtoSMT, PtoSABP2, PtoPR-1, PtoPR-2, PtoPR-5 and PtoPR-10.** PtoSMT (GeneBank No. JQ086572) and PtoSABP2 (GeneBank No. JQ086570) sequences were submitted by us. Other sequences were from NCBI.

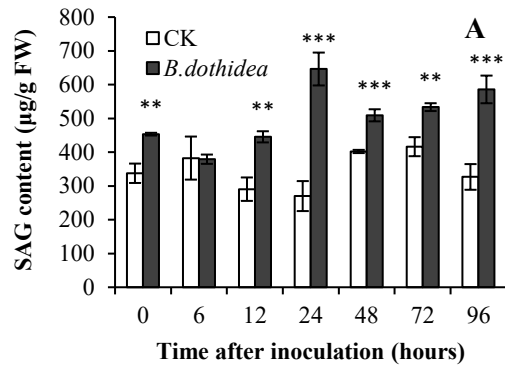

**Fig. S2 Liquid chromatography of SAG in *P. tomentosa* after *B. dothidea* inoculation.** SAG, SA glucoside (a storage form of SA). □, CK (control) inoculation with culture-medium; ■, inoculation with *B. dothidea*. Infected sites were 5 mm around the inoculation sites and uninfected sites were 10 cm away from inoculation sites. Error bars represent SEM. P values for differences between inoculation with *B. dothidea* and control: \* $P < 0.05$ , \*\* $P < 0.01$  and \*\*\* $P < 0.001$  (Independent-samples T test).

**Table S1 Primer sequences for the qRT-PCR analysis of *SAMT*, *SABP2*, and PR genes in *P. tomentosa* following inoculation with *B. dothidea*.**

| <b>Target gene</b> | <b>GenBank No.</b> | <b>Forward primer sequence (5'–3')</b> | <b>Reverse primer sequence (5'–3')</b> |
|--------------------|--------------------|----------------------------------------|----------------------------------------|
| <i>SABP2</i>       | JQ086570           | GTTTGAGTTTGGCTCTTGCT                   | TGTGGTATCTGGCATGAAAG                   |
| <i>SAMT</i>        | JQ086572           | CAGCACAAGTCCACCAAGCGT                  | TTGAGAGCCACAGCCAAAAGC                  |
| PR-1               | HM589199           | GCTATAACAATCCCTCTATCCCTT               | CCACACAATATTTCCAACACCTAC               |
| PR-2               | MH182683           | TACCAATGACTGGGAGGAGCAC                 | AAGACACGGCGGACATAGAGC                  |
| PR-5               | HM589200           | ATCGTTGTTTCCCTGCTTCC                   | AAATTGCACTTGGTCCGTCC                   |
| PR-10              | HM589201           | ATGAGTTTTCTGTCGCTGTCCC                 | ACCTTCCTTATTGTTCCCTGGCC                |
| PAL                | EU760386           | TGAAGAAATAAGTCCCAACGAGT                | TCAAAGGAGCTGAAATAGCAATG                |
| $\beta$ -Tubulin   | MH173049           | GCACCAACTTGTTGAGAATGC                  | TTTCAACTGACCAGGGAACC                   |
